# Supplementary material for: pGQL: A probabilistic graphical query language for gene expression time courses
Source: Springer Nature journal article supplement (doi:10.1186/1756-0381-4-9), 2011-04-18

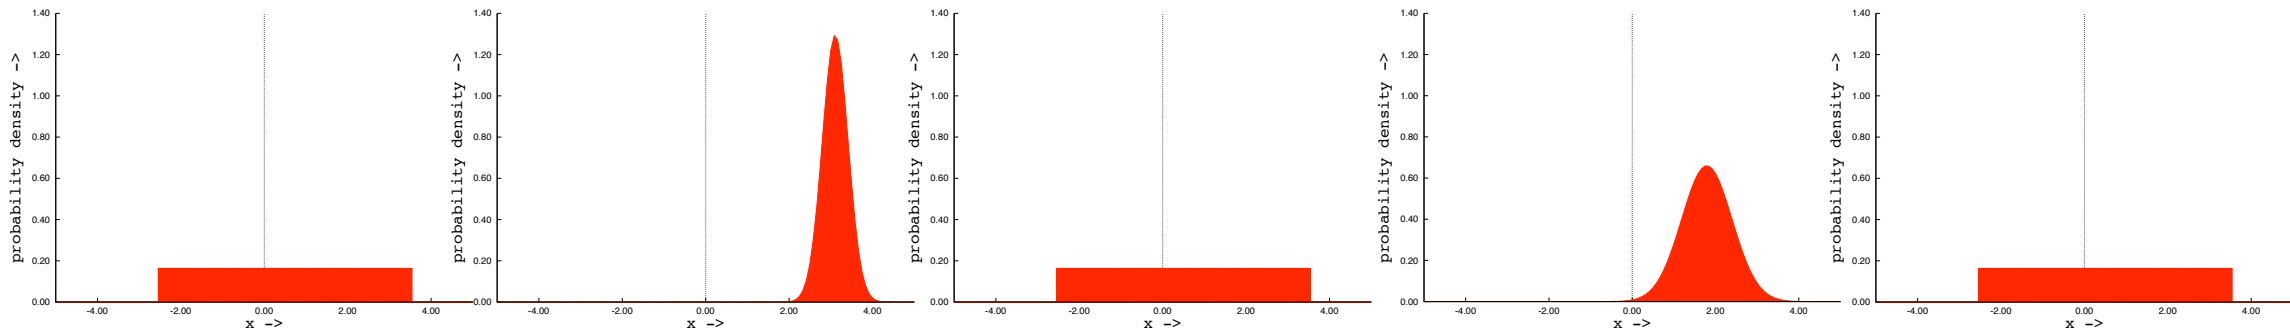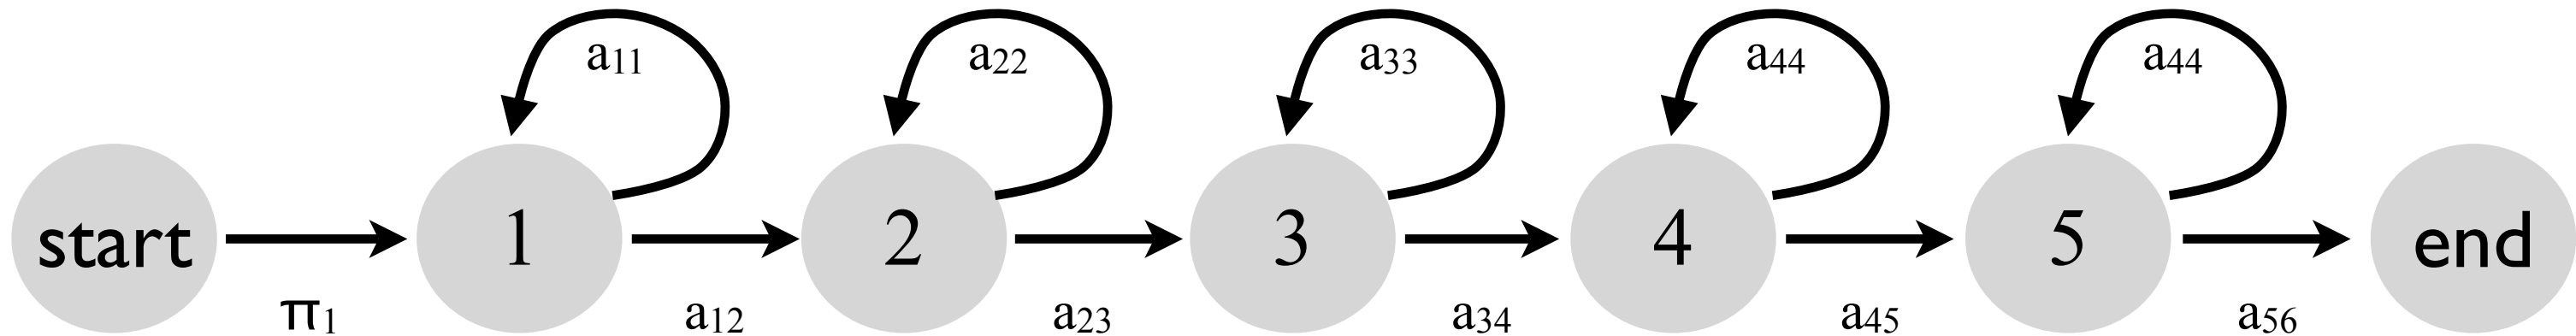

Supplement: 13040_2010_41_MOESM5_ESM.pdf [file 13040_2010_41_MOESM5_ESM.pdf]
